# Supplementary material
Source: publisher site journal article supplement (http://kjim.org/upload/media/kjim-2021-021-suppl4.pdf)
Supplement: Supplementary file 1 [file kjim-2021-021-suppl4.pdf]

**Supplementary Table 4. Univariate and multivariate analyses showing significant predictive factors of 7-day mortality (n = 972)**

| Variable                   | Univariate analysis |                     | Multivariate analysis |                     |
|----------------------------|---------------------|---------------------|-----------------------|---------------------|
|                            | p value             | HR (95% CI)         | p value               | HR (95% CI)         |
| Male sex                   | 0.039               | 0.702 (0.501–0.983) | 0.140                 | 0.767 (0.538–1.091) |
| Age, yr                    | < 0.001             | 1.026 (1.013–1.040) | 0.001                 | 1.024 (1.009–1.038) |
| Ammonia level <sup>a</sup> |                     |                     |                       |                     |
| Grade 0                    |                     | Reference           |                       |                     |
| Grade 1                    | 0.288               | 1.245 (0.831–1.864) | 0.775                 | 1.063 (0.700–1.613) |
| Grade 2                    | < 0.001             | 3.256 (1.904–5.570) | < 0.001               | 2.264 (1.271–4.033) |
| Grade 3                    | < 0.001             | 5.844 (3.526–9.687) | < 0.001               | 4.649 (2.679–8.066) |
| Acute brain failure        | < 0.001             | 3.349 (2.063–5.436) | < 0.001               | 2.903 (1.761–4.786) |
| Diabetes                   | 0.004               | 1.645 (1.169–2.314) | 0.490                 | 1.136 (0.791–1.630) |
| AKI                        | < 0.001             | 1.920 (1.372–2.686) | 0.277                 | 1.239 (0.842–1.825) |
| Infection                  | 0.001               | 1.736 (1.242–2.428) | 0.816                 | 1.047 (0.709–1.546) |
| Platelet, $\times 10^9/L$  | < 0.001             | 0.996 (0.994–0.998) | 0.001                 | 0.997 (0.995–0.999) |
| PT-INR, unit               | 0.006               | 1.175 (1.048–1.318) | 0.909                 | 0.988 (0.807–1.210) |
| Total cholesterol, mg/dL   | 0.005               | 0.995 (0.992–0.999) | 0.355                 | 1.002 (0.998–1.005) |
| Albumin, g/dL              | < 0.001             | 0.551 (0.455–0.667) | 0.001                 | 0.641 (0.495–0.831) |

HR, hazard ratio; CI, confidence interval; AKI, acute kidney injury; PT-INR, prothrombin time-international normalized ratio.

<sup>a</sup>Ammonia level: Grade 0  $\leq 80 \mu\text{g/dL}$ ,  $80 \mu\text{g/dL} < \text{Grade 1} \leq 160 \mu\text{g/dL}$ ,  $160 \mu\text{g/dL} < \text{Grade 2} \leq 240 \mu\text{g/dL}$ , and Grade 3  $> 240 \mu\text{g/dL}$ .
